# Supplementary material
Source: PubMed Central journal article supplement (PMC3865608)
Supplement: NIHMS532811-supplement-ESI.pdf [file NIHMS532811-supplement-ESI.pdf]

Supplementary information  
For

**Tunable mechano-responsive organogels by ring-opening copolymerizations of *N*-carboxyanhydrides**

Jingwei Fan, Jiong Zou,<sup>\*</sup> Xun He, Fuwu Zhang, Shiyi Zhang, Jeffery E. Raymond and Karen L. Wooley<sup>\*</sup>

*Departments of Chemistry and Chemical Engineering, Laboratory for Synthetic-Biologic Interactions, Texas A&M University, P.O. BOX 30012, 3255 TAMU, College Station, TX 77842 (USA).*

*\* Corresponding author: Email: [jiong.zou@chem.tamu.edu](mailto:jiong.zou@chem.tamu.edu), [Wooley@chem.tamu.edu](mailto:Wooley@chem.tamu.edu)  
Tel: (979) 845-4077*

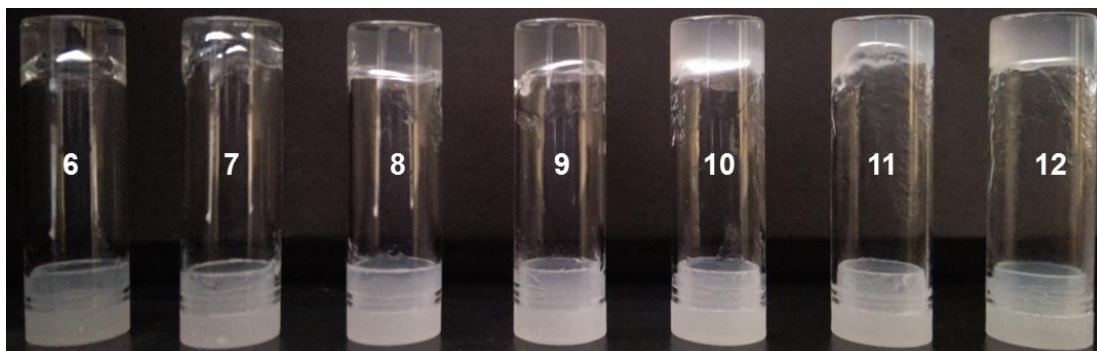

**Fig. S1** Images of organogels from polymers **6**, **7**, **8**, **9**, **10**, **11** and **12** in DMF (2.5 wt %).

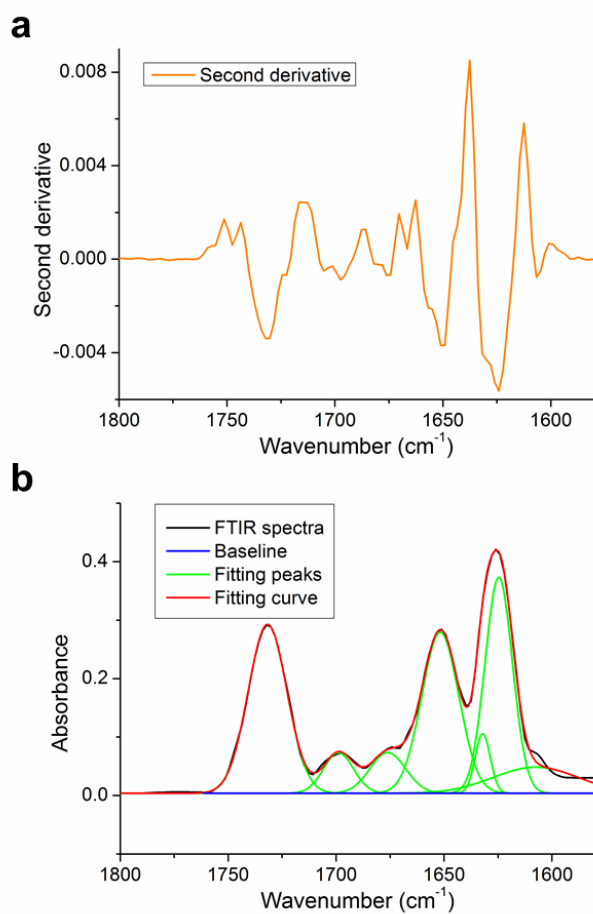

**Fig. S2** (a) Second derivative and (b) ATR-FTIR spectra (black), fitting curve (red), baseline (blue) and fitting peaks (green) for polymer **7** in the solid state.

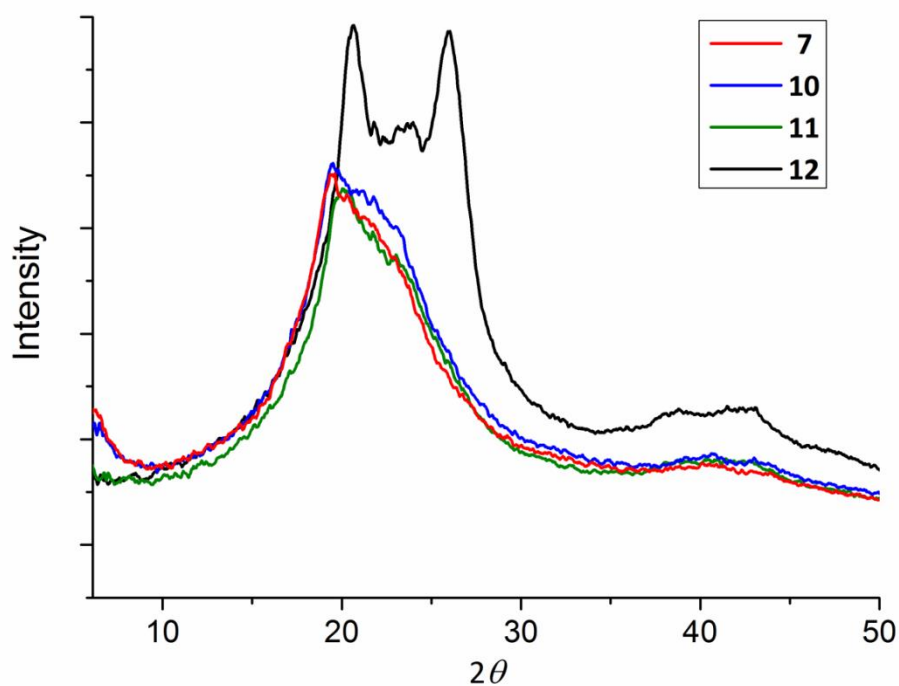

**Fig. S3** WAXS patterns for polymers **7**, **10**, **11** and **12** in the solid state.

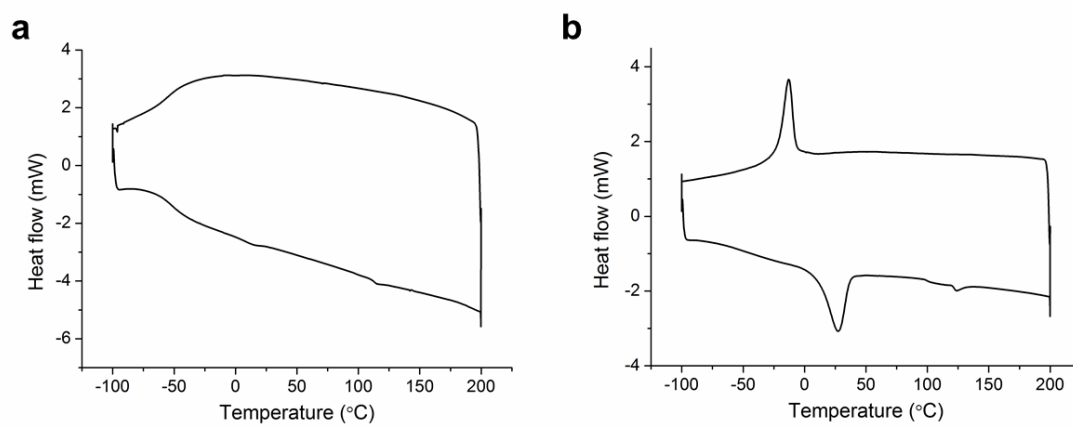

**Fig. S4** DSC traces of polymers (a) **11** and (b) **12** in the solid state. The samples were heated from  $-100\text{ }^{\circ}\text{C}$  to  $200\text{ }^{\circ}\text{C}$  and cooled back to  $-100\text{ }^{\circ}\text{C}$ , each with a rate of  $10\text{ }^{\circ}\text{C}/\text{min}$ . The second heating and cooling traces are shown here.

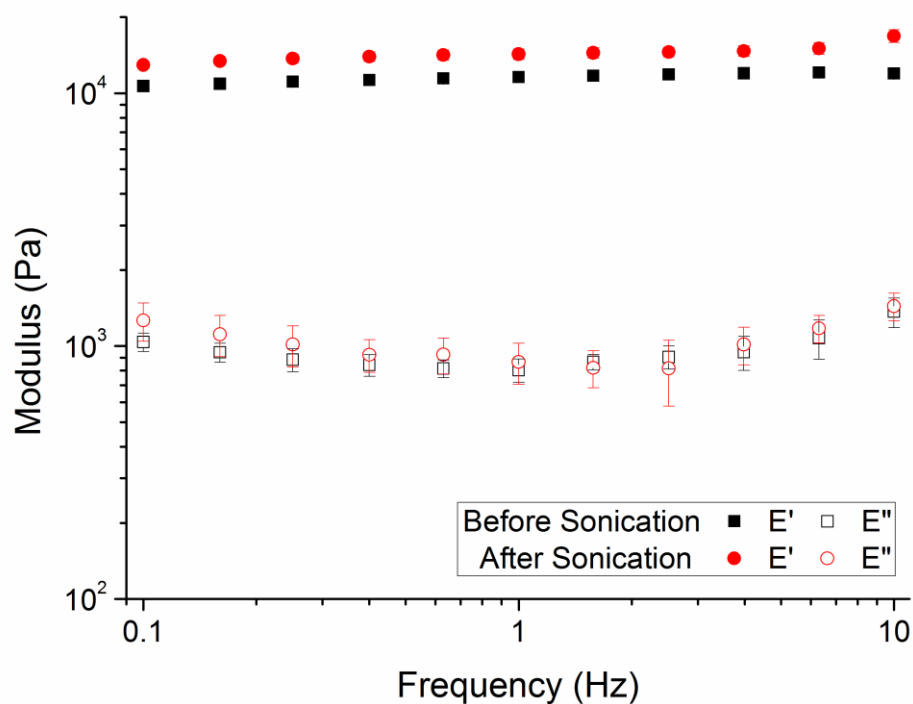

**Fig. S5** Moduli of organogels from polymer **11** in DMF (5 wt %) before and after sonication as a function of frequency conducted by DMA.  $E'$  and  $E''$  indicate storage and loss modulus, respectively.

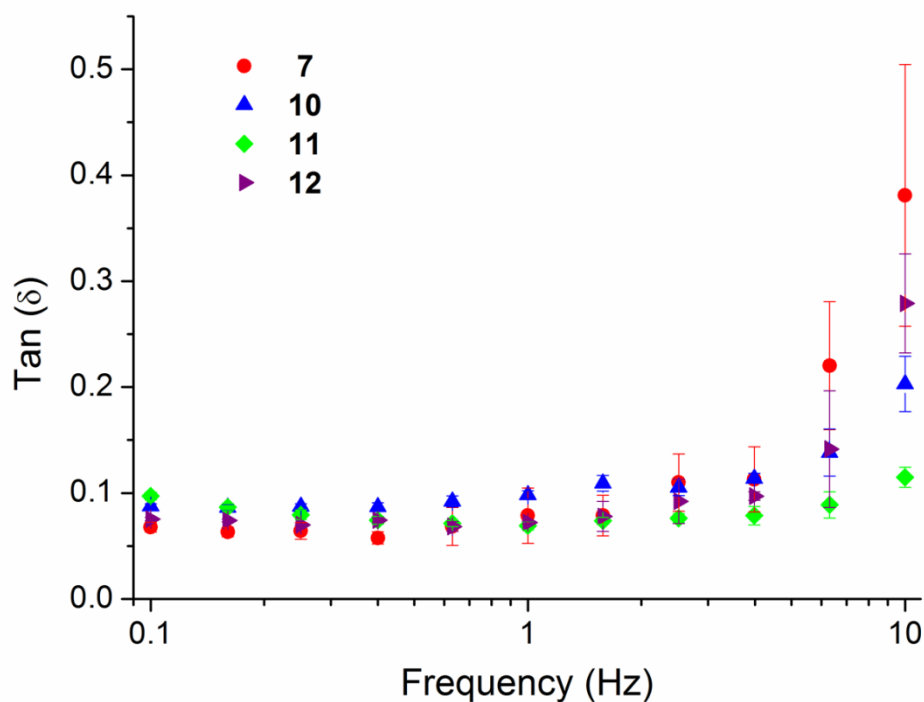

**Fig. S6**  $\text{Tan}(\delta)$  of organogels from polymers **7**, **10**, **11** and **12** in DMF (5 wt %) as a function of frequency, conducted by DMA.
